# Supplementary material for: Prevalence of sleep disorder diagnoses and sleep medication prescriptions in individuals with ADHD across the lifespan: a Swedish nationwide register-based study
Source: HighWire-hosted journal article supplement (doi:10.1136/bmjment-2023-300809), 2023-08-01
Supplement: bmjment-2023-300809supp001_data_supplement.pdf [file bmjment-2023-300809supp001_data_supplement.pdf]

## **Prevalence of sleep disorder diagnoses and sleep medication prescriptions in individuals with ADHD across the lifespan: a Swedish nationwide register-based study**

### *Supplements*

**Supplementary Table S1:** Absolute and relative rates of sleep disorders and sleep medications in individuals 5-11 years (page 2)

**Supplementary Table S2:** Absolute and relative rates of sleep disorders and sleep medications in individuals 12-17 years (page 3)

**Supplementary Table S3:** Absolute and relative rates of sleep disorders and sleep medications in individuals 18-30 years (page 4)

**Supplementary Table S4:** Absolute and relative rates of sleep disorders and sleep medications in individuals 31-45 years (page 5)

**Supplementary Table S5:** Absolute and relative rates of sleep disorders and sleep medications in individuals 46-60 years (page 6)

**Supplementary Table S6:** Absolute and relative rates of sleep disorders and sleep medications in males with and without ADHD (5-60 years) (page 7)

**Supplementary Table S7:** Absolute and relative rates of sleep disorders and sleep medications in females with and without ADHD (5-60 years) (page 8)

**Supplementary Table S8:** Absolute and relative rates of sleep disorders and sleep medications in individuals with and without ADHD (5-60 years): excluding individuals in the ADHD group who have been prescribed ADHD medication (page 9)

**Table S1:** Absolute and relative rates of sleep disorders and sleep medications in individuals 5-11 years.

| <b>CHILD COHORT<br/>(Born 1993-2008)</b> |                                  |              |                                       |             |               |                      |                      |
|------------------------------------------|----------------------------------|--------------|---------------------------------------|-------------|---------------|----------------------|----------------------|
| ADHD prev=2.36%                          | <b>ADHD group<br/>(N=40,474)</b> |              | <b>Non-ADHD group<br/>(N=1671013)</b> |             | <b>OR</b>     | <b>95%<br/>Lower</b> | <b>95%<br/>Upper</b> |
| <b>Diagnosed sleep disorder</b>          | <b>N</b>                         | <b>%</b>     | <b>N</b>                              | <b>%</b>    |               |                      |                      |
| Insomnia                                 | 416                              | 1.03         | 1581                                  | 0.09        | 16.07         | 14.33                | 18.01                |
| Hypersomnia                              | 24                               | 0.06         | 182                                   | 0.01        | 7.67          | 4.95                 | 11.90                |
| Sleepwalk                                | 17                               | 0.04         | 123                                   | 0.01        | 5.44          | 3.25                 | 9.10                 |
| Sleep-wake schedule (circadian rhythm)   | 128                              | 0.32         | 581                                   | 0.03        | 13.19         | 10.79                | 16.12                |
| Sleep terror                             | 35                               | 0.09         | 251                                   | 0.02        | 4.92          | 3.44                 | 7.03                 |
| Nightmares                               | 9                                | 0.02         | 111                                   | 0.01        | 3.98          | 2.00                 | 7.95                 |
| Other                                    | 53                               | 0.13         | 278                                   | 0.02        | 10.58         | 7.79                 | 14.35                |
| Unspecified                              | 1076                             | 2.66         | 5238                                  | 0.32        | 10.21         | 9.53                 | 10.94                |
| RLS                                      | 16                               | 0.04         | 109                                   | 0.01        | 8.80          | 5.12                 | 15.13                |
| Sleep apnoea                             | 174                              | 0.43         | 2615                                  | 0.16        | 2.59          | 2.22                 | 3.03                 |
| Narcolepsy and cataplexy                 | 106                              | 0.26         | 243                                   | 0.01        | 24.66         | 19.36                | 31.42                |
| <i>Any sleep disorder</i>                | <i>1829</i>                      | <i>4.52</i>  | <i>10241</i>                          | <i>0.61</i> | <i>8.73</i>   | <i>8.28</i>          | <i>9.19</i>          |
| <b>Medication prescription</b>           |                                  |              |                                       |             |               |                      |                      |
| Zopiclone                                | 35                               | 0.09         | 58                                    | 0.003       | 28.82         | 18.51                | 44.86                |
| Zolpidem                                 | 34                               | 0.08         | 52                                    | 0.003       | 33.27         | 21.03                | 52.64                |
| Melatonin                                | 10327                            | 25.52        | 4202                                  | 0.25        | 135.03        | 129.83               | 140.44               |
| Propiomazin                              | 277                              | 0.68         | 214                                   | 0.01        | 56.05         | 46.48                | 67.58                |
| Zaleplon                                 | 1                                | 0.002        | 1                                     | 0           | 68.89         | 3.41                 | 1392.42              |
| <i>Any sleep medication</i>              | <i>10400</i>                     | <i>25.70</i> | <i>4407</i>                           | <i>0.26</i> | <i>129.35</i> | <i>124.45</i>        | <i>134.45</i>        |

Note: OR=Odds ratio, 95% CI=95% Confidence interval, RLS=Restless Leg Syndrome.

**Table S2:** Absolute and relative rates of sleep disorders and sleep medications in individuals 12-17 years.

| <b>ADOLESCENT COHORT<br/>(Born 1988-2000)</b> |                                 |              |                                       |             |              |                      |                      |
|-----------------------------------------------|---------------------------------|--------------|---------------------------------------|-------------|--------------|----------------------|----------------------|
| ADHD prev=3.12%                               | <b>ADHD group<br/>(N=47017)</b> |              | <b>Non-ADHD group<br/>(N=1457622)</b> |             | <b>OR</b>    | <b>95%<br/>Lower</b> | <b>95%<br/>Upper</b> |
| <b>Diagnosed sleep disorder</b>               | <b>N</b>                        | <b>%</b>     | <b>N</b>                              | <b>%</b>    |              |                      |                      |
| Insomnia                                      | 558                             | 1.19         | 700                                   | 0.05        | 25.89        | 23.01                | 29.12                |
| Hypersomnia                                   | 38                              | 0.08         | 57                                    | 0.004       | 20.82        | 13.50                | 32.11                |
| Sleepwalk                                     | 7                               | 0.01         | 37                                    | 0.003       | 4.53         | 1.99                 | 10.33                |
| Sleep-wake schedule (circadian rhythm)        | 234                             | 0.50         | 302                                   | 0.02        | 26.76        | 22.30                | 32.11                |
| Sleep terror                                  | 7                               | 0.01         | 23                                    | 0.002       | 7.42         | 3.10                 | 17.74                |
| Nightmares                                    | 8                               | 0.02         | 57                                    | 0.004       | 4.22         | 1.98                 | 8.97                 |
| Other                                         | 45                              | 0.10         | 109                                   | 0.007       | 11.06        | 7.72                 | 15.84                |
| Unspecified                                   | 1011                            | 2.15         | 2106                                  | 0.14        | 14.08        | 13.01                | 15.23                |
| RLS                                           | 9                               | 0.02         | 46                                    | 0.003       | 6.31         | 3.03                 | 13.15                |
| Sleep apnoea                                  | 55                              | 0.12         | 439                                   | 0.03        | 3.39         | 2.55                 | 4.51                 |
| Narcolepsy and cataplexy                      | 143                             | 0.30         | 45                                    | 0.003       | 96.54        | 68.23                | 136.58               |
| <i>Any sleep disorder</i>                     | <i>1900</i>                     | <i>4.04</i>  | <i>3627</i>                           | <i>0.25</i> | <i>16.13</i> | <i>15.21</i>         | <i>17.10</i>         |
| <b>Medication prescription</b>                |                                 |              |                                       |             |              |                      |                      |
| Zopiclone                                     | 836                             | 1.78         | 3221                                  | 0.22        | 10.16        | 9.38                 | 11.00                |
| Zolpidem                                      | 503                             | 1.07         | 2060                                  | 0.14        | 10.59        | 9.55                 | 11.73                |
| Melatonin                                     | 11944                           | 25.40        | 10029                                 | 0.69        | 42.61        | 41.35                | 43.90                |
| Propiomazin                                   | 3031                            | 6.44         | 9327                                  | 0.64        | 12.22        | 11.70                | 12.78                |
| Zaleplon                                      | 14                              | 0.03         | 107                                   | 0.007       | 7.19         | 4.03                 | 12.83                |
| <i>Any sleep medication</i>                   | <i>13600</i>                    | <i>28.93</i> | <i>20240</i>                          | <i>1.39</i> | <i>28.10</i> | <i>27.39</i>         | <i>28.83</i>         |

Note: OR=Odds ratio, 95% CI=95% Confidence interval, RLS=Restless Leg Syndrome.

**Table S3:** Absolute and relative rates of sleep disorders and sleep medications in individuals 18-30 years.

| <b>YOUNG ADULT COHORT<br/>(1975-1995)</b> |                                 |              |                                       |             |              |                      |                      |
|-------------------------------------------|---------------------------------|--------------|---------------------------------------|-------------|--------------|----------------------|----------------------|
| ADHD prev=1.97%                           | <b>ADHD group<br/>(N=49516)</b> |              | <b>Non-ADHD group<br/>(N=2462979)</b> |             | <b>OR</b>    | <b>95%<br/>Lower</b> | <b>95%<br/>Upper</b> |
| <b>Diagnosed sleep disorder</b>           | <b>N</b>                        | <b>%</b>     | <b>N</b>                              | <b>%</b>    |              |                      |                      |
| Insomnia                                  | 707                             | 1.43         | 2042                                  | 0.08        | 17.45        | 15.95                | 19.08                |
| Hypersomnia                               | 186                             | 0.38         | 518                                   | 0.02        | 18.63        | 15.64                | 22.20                |
| Sleepwalk                                 | 19                              | 0.04         | 154                                   | 0.006       | 6.11         | 3.75                 | 9.94                 |
| Sleep-wake schedule (circadian rhythm)    | 266                             | 0.54         | 649                                   | 0.03        | 17.42        | 15.03                | 20.20                |
| Sleep terror                              | 5                               | 0.01         | 40                                    | 0.002       | 7.26         | 2.79                 | 18.88                |
| Nightmares                                | 19                              | 0.04         | 107                                   | 0.004       | 9.03         | 5.47                 | 14.90                |
| Other                                     | 108                             | 0.22         | 332                                   | 0.01        | 13.53        | 10.83                | 16.92                |
| Unspecified                               | 1758                            | 3.55         | 5662                                  | 0.23        | 14.55        | 13.76                | 15.39                |
| RLS                                       | 61                              | 0.12         | 379                                   | 0.02        | 8.91         | 6.74                 | 11.77                |
| Sleep apnoea                              | 242                             | 0.49         | 3673                                  | 0.15        | 3.49         | 3.06                 | 3.98                 |
| Narcolepsy and cataplexy                  | 215                             | 0.43         | 204                                   | 0.008       | 48.23        | 39.44                | 58.99                |
| <i>Any sleep disorder</i>                 | <i>3113</i>                     | <i>6.29</i>  | <i>12517</i>                          | <i>0.51</i> | <i>12.59</i> | <i>12.08</i>         | <i>13.12</i>         |
| <b>Medication prescription</b>            |                                 |              |                                       |             |              |                      |                      |
| Zopiclone                                 | 12834                           | 25.92        | 82132                                 | 3.33        | 10.87        | 10.63                | 11.11                |
| Zolpidem                                  | 8515                            | 17.19        | 58249                                 | 2.36        | 10.29        | 10.03                | 10.56                |
| Melatonin                                 | 8933                            | 18.04        | 13072                                 | 0.53        | 32.10        | 31.17                | 33.06                |
| Propiomazin                               | 13594                           | 27.45        | 88088                                 | 3.58        | 10.44        | 10.22                | 10.67                |
| Zaleplon                                  | 886                             | 1.79         | 3897                                  | 0.16        | 16.58        | 15.34                | 17.92                |
| <i>Any sleep medication</i>               | <i>24199</i>                    | <i>48.87</i> | <i>172515</i>                         | <i>7.00</i> | <i>13.45</i> | <i>13.20</i>         | <i>13.70</i>         |

Note: OR=Odds ratio, 95% CI=95% Confidence interval, RLS=Restless Leg Syndrome.

**Table S4:** Absolute and relative rates of sleep disorders and sleep medications in individuals 31-45 years.

| <b>MIDDLE-AGED ADULT COHORT (1960-1982)</b> |                             |              |                                   |              |              |                  |                  |
|---------------------------------------------|-----------------------------|--------------|-----------------------------------|--------------|--------------|------------------|------------------|
| Prev adhd=0.98%                             | <b>ADHD group (N=26865)</b> |              | <b>Non-ADHD group (N=2716319)</b> |              | <b>OR</b>    | <b>95% Lower</b> | <b>95% Upper</b> |
| <b>Diagnosed sleep disorder</b>             | <b>N</b>                    | <b>%</b>     | <b>N</b>                          | <b>%</b>     |              |                  |                  |
| Insomnia                                    | 390                         | 1.45         | 2769                              | 0.10         | 14.37        | 12.90            | 16.01            |
| Hypersomnia                                 | 168                         | 0.63         | 562                               | 0.02         | 29.95        | 25.11            | 35.71            |
| Sleepwalk                                   | 11                          | 0.04         | 121                               | 0.004        | 8.18         | 4.40             | 15.22            |
| Sleep-wake schedule (circadian rhythm)      | 77                          | 0.29         | 454                               | 0.02         | 16.13        | 12.63            | 20.60            |
| Sleep terror                                | 8                           | 0.03         | 21                                | 0            | 32.57        | 14.27            | 74.33            |
| Nightmares                                  | 11                          | 0.04         | 71                                | 0.002        | 15.29        | 8.04             | 29.09            |
| Other                                       | 46                          | 0.17         | 342                               | 0.01         | 13.16        | 9.64             | 17.97            |
| Unspecified                                 | 943                         | 3.51         | 6806                              | 0.25         | 13.57        | 12.65            | 14.55            |
| RLS                                         | 95                          | 0.35         | 1188                              | 0.04         | 8.44         | 6.83             | 10.42            |
| Sleep apnoea                                | 675                         | 2.51         | 19534                             | 0.71         | 3.71         | 3.43             | 4.01             |
| Narcolepsy and cataplexy                    | 174                         | 0.65         | 155                               | 0.006        | 117.06       | 93.54            | 146.49           |
| <i>Any sleep disorder</i>                   | <i>2203</i>                 | <i>8.20</i>  | <i>29841</i>                      | <i>1.10</i>  | <i>8.14</i>  | <i>7.78</i>      | <i>8.52</i>      |
| <b>Medication prescription</b>              |                             |              |                                   |              |              |                  |                  |
| Zopiclone                                   | 10837                       | 40.34        | 171177                            | 6.30         | 10.27        | 10.01            | 10.53            |
| Zolpidem                                    | 7443                        | 27.71        | 132840                            | 4.89         | 8.01         | 7.79             | 8.24             |
| Melatonin                                   | 4113                        | 15.31        | 13772                             | 0.51         | 32.12        | 30.93            | 33.36            |
| Propiomazin                                 | 9185                        | 34.19        | 147597                            | 5.43         | 9.20         | 8.96             | 9.44             |
| Zaleplon                                    | 815                         | 3.03         | 7892                              | 0.29         | 12.32        | 11.43            | 13.26            |
| <i>Any sleep medication</i>                 | <i>16695</i>                | <i>62.14</i> | <i>327856</i>                     | <i>12.07</i> | <i>12.57</i> | <i>12.26</i>     | <i>12.89</i>     |

Note: OR=Odds ratio, 95% CI=95% Confidence interval, RLS=Restless Leg Syndrome.

**Table S5:** Absolute and relative rates of sleep disorders and sleep medications in individuals 46-60 years.

| <b>OLDER ADULT COHORT (1945-1973)</b>  |                             |              |                                   |              |              |                  |                  |
|----------------------------------------|-----------------------------|--------------|-----------------------------------|--------------|--------------|------------------|------------------|
| Prev adhd=0.40%                        | <b>ADHD group (N=13711)</b> |              | <b>Non-ADHD group (N=3383005)</b> |              | <b>OR</b>    | <b>95% Lower</b> | <b>95% Upper</b> |
| <b>Diagnosed sleep disorder</b>        | <b>N</b>                    | <b>%</b>     | <b>N</b>                          | <b>%</b>     |              |                  |                  |
| Insomnia                               | 187                         | 1.36         | 3247                              | 0.10         | 16.28        | 14.03            | 18.91            |
| Hypersomnia                            | 95                          | 0.69         | 431                               | 0.01         | 63.34        | 50.47            | 79.50            |
| Sleepwalk                              | 5                           | 0.04         | 52                                | 0.002        | 24.93        | 9.91             | 62.69            |
| Sleep-wake schedule (circadian rhythm) | 25                          | 0.18         | 374                               | 0.01         | 18.42        | 12.26            | 27.69            |
| Sleep terror                           | 0                           | 0            | 15                                | 0            | -            |                  |                  |
| Nightmares                             | 3                           | 0.02         | 70                                | 0.002        | 11.84        | 3.71             | 37.81            |
| Other                                  | 24                          | 0.18         | 358                               | 0.01         | 18.33        | 12.09            | 27.79            |
| Unspecified                            | 359                         | 2.62         | 7385                              | 0.22         | 13.19        | 11.85            | 14.69            |
| RLS                                    | 65                          | 0.47         | 2430                              | 0.07         | 7.65         | 5.97             | 9.80             |
| Sleep apnoea                           | 527                         | 3.84         | 47188                             | 1.39         | 3.27         | 2.99             | 3.57             |
| Narcolepsy and cataplexy               | 126                         | 0.92         | 128                               | 0.004        | 356.80       | 273.13           | 466.10           |
| <i>Any sleep disorder</i>              | <i>1212</i>                 | <i>8.84</i>  | <i>58527</i>                      | <i>1.73</i>  | <i>6.35</i>  | <i>5.98</i>      | <i>6.74</i>      |
| <b>Medication prescription</b>         |                             |              |                                   |              |              |                  |                  |
| Zopiclone                              | 5560                        | 40.55        | 259305                            | 7.66         | 9.62         | 9.29             | 9.96             |
| Zolpidem                               | 3615                        | 26.37        | 206663                            | 6.11         | 6.81         | 6.55             | 7.08             |
| Melatonin                              | 1875                        | 13.68        | 23496                             | 0.69         | 24.82        | 23.58            | 26.11            |
| Propiomazin                            | 4277                        | 31.19        | 195074                            | 5.77         | 8.45         | 8.14             | 8.76             |
| Zaleplon                               | 336                         | 2.45         | 10854                             | 0.32         | 10.14        | 9.08             | 11.33            |
| <i>Any sleep medication</i>            | <i>8485</i>                 | <i>61.88</i> | <i>484446</i>                     | <i>14.32</i> | <i>12.03</i> | <i>11.62</i>     | <i>12.47</i>     |

Note: OR=Odds ratio, 95% CI=95% Confidence interval, RLS=Restless Leg Syndrome.

**Table S6:** Absolute and relative rates of sleep disorders and sleep medications in males with and without ADHD (5-60 years).

| <b>Males (1945-2008)</b>                     |                                  |          |                                      |          |           |                      |                      |
|----------------------------------------------|----------------------------------|----------|--------------------------------------|----------|-----------|----------------------|----------------------|
| ADHD prev=2.77<br>%                          | <b>ADHD group<br/>(N=91,518)</b> |          | <b>Non-ADHD group<br/>(N=320945)</b> |          | <b>OR</b> | <b>95%<br/>Lower</b> | <b>95%<br/>Upper</b> |
| <b>Diagnosed sleep<br/>disorder</b>          | <b>N</b>                         | <b>%</b> | <b>N</b>                             | <b>%</b> |           |                      |                      |
| Insomnia                                     | 1381                             | 1.51     | 3714                                 | 0.12     | 17.01     | 15.92                | 18.17                |
| Hypersomnia                                  | 234                              | 0.26     | 641                                  | 0.02     | 18.11     | 15.44                | 21.25                |
| Sleepwalk                                    | 42                               | 0.05     | 253                                  | 0.008    | 5.07      | 3.63                 | 7.07                 |
| Sleep-wake<br>schedule (circadian<br>rhythm) | 540                              | 0.59     | 981                                  | 0.03     | 18.66     | 16.71                | 20.84                |
| Sleep terror                                 | 41                               | 0.05     | 217                                  | 0.007    | 4.28      | 3.06                 | 5.98                 |
| Nightmares                                   | 29                               | 0.03     | 166                                  | 0.005    | 6.12      | 4.08                 | 9.18                 |
| Other                                        | 167                              | 0.18     | 614                                  | 0.02     | 11.03     | 9.22                 | 13.20                |
| Unspecified                                  | 3166                             | 3.46     | 11332                                | 0.35     | 11.85     | 11.36                | 12.36                |
| RLS                                          | 127                              | 0.14     | 1407                                 | 0.04     | 6.78      | 5.61                 | 8.17                 |
| Sleep apnoea                                 | 1332                             | 1.46     | 45815                                | 1.43     | 2.40      | 2.27                 | 2.54                 |
| Narcolepsy and<br>cataplexy                  | 294                              | 0.32     | 201                                  | 0.01     | 59.70     | 49.22                | 72.42                |
| <i>Any sleep disorder</i>                    | 6328                             | 6.91     | 61120                                | 1.90     | 7.28      | 7.08                 | 7.49                 |
| <b>Medication<br/>prescription</b>           |                                  |          |                                      |          |           |                      |                      |
| Zopiclone                                    | 14721                            | 16.09    | 158108                               | 4.70     | 7.63      | 7.48                 | 7.78                 |
| Zolpidem                                     | 9723                             | 10.62    | 113881                               | 3.55     | 6.66      | 6.51                 | 6.82                 |
| Melatonin                                    | 21742                            | 23.76    | 22870                                | 0.71     | 40.54     | 39.70                | 41.40                |
| Propiomazin                                  | 15715                            | 17.17    | 145976                               | 4.55     | 7.88      | 7.73                 | 8.03                 |
| Zaleplon                                     | 1142                             | 1.25     | 6817                                 | 0.21     | 11.31     | 10.58                | 12.09                |
| <i>Any sleep<br/>medication</i>              | 38970                            | 42.58    | 305857                               | 9.53     | 14.17     | 13.96                | 14.39                |

Note: OR=Odds ratio, 95% CI=95% Confidence interval, RLS=Restless Leg Syndrome.

**Table S7:** Absolute and relative rates of sleep disorders and sleep medications in females with and without ADHD (5-60 years).

| <b>Females (1945-2008)</b>             |                              |          |                                   |          |           |                  |                  |
|----------------------------------------|------------------------------|----------|-----------------------------------|----------|-----------|------------------|------------------|
| ADHD prev=1.70 %                       | <b>ADHD group (N=53,972)</b> |          | <b>Non-ADHD group (N=3115223)</b> |          | <b>OR</b> | <b>95% Lower</b> | <b>95% Upper</b> |
| <b>Diagnosed sleep disorder</b>        | <b>N</b>                     | <b>%</b> | <b>N</b>                          | <b>%</b> |           |                  |                  |
| Insomnia                               | 1111                         | 2.06     | 4930                              | 0.16     | 15.75     | 14.72            | 16.84            |
| Hypersomnia                            | 289                          | 0.54     | 884                               | 0.03     | 22.45     | 19.57            | 25.74            |
| Sleepwalk                              | 28                           | 0.05     | 183                               | 0.006    | 8.83      | 5.91             | 13.20            |
| Sleep-wake schedule (circadian rhythm) | 294                          | 0.54     | 871                               | 0.03     | 19.89     | 17.37            | 22.76            |
| Sleep terror                           | 16                           | 0.03     | 112                               | 0.004    | 6.61      | 3.91             | 11.16            |
| Nightmares                             | 31                           | 0.06     | 181                               | 0.006    | 9.18      | 6.26             | 13.49            |
| Other                                  | 136                          | 0.25     | 560                               | 0.02     | 15.32     | 12.65            | 18.55            |
| Unspecified                            | 2418                         | 4.48     | 11957                             | 0.38     | 13.21     | 12.63            | 13.83            |
| RLS                                    | 149                          | 0.28     | 2128                              | 0.07     | 6.92      | 5.84             | 8.19             |
| Sleep apnoea                           | 521                          | 0.97     | 14957                             | 0.48     | 3.68      | 3.37             | 4.02             |
| Narcolepsy and cataplexy               | 353                          | 0.65     | 260                               | 0.01     | 85.30     | 72.25            | 100.69           |
| <i>Any sleep disorder</i>              | 4528                         | 8.39     | 33955                             | 1.09     | 11.21     | 10.85            | 11.59            |
| <b>Medication prescription</b>         |                              |          |                                   |          |           |                  |                  |
| Zopiclone                              | 15214                        | 28.19    | 245580                            | 7.89     | 8.25      | 8.09             | 8.43             |
| Zolpidem                               | 10573                        | 19.59    | 184497                            | 5.92     | 7.06      | 6.89             | 7.22             |
| Melatonin                              | 13691                        | 25.37    | 33826                             | 1.06     | 33.12     | 32.38            | 33.89            |
| Propiomazin                            | 15908                        | 29.47    | 212023                            | 6.80     | 8.87      | 8.69             | 9.05             |
| Zaleplon                               | 1136                         | 2.10     | 10,809                            | 0.35     | 9.97      | 9.36             | 10.62            |
| <i>Any sleep medication</i>            | 30111                        | 55.80    | 451925                            | 14.51    | 14.03     | 13.77            | 14.29            |

Note: OR=Odds ratio, 95% CI=95% Confidence interval, RLS=Restless Leg Syndrome.



**Table S8:** Absolute and relative rates of sleep disorders and sleep medications in individuals with and without ADHD (5-60 years): excluding individuals in the ADHD group who have been prescribed ADHD medication

| <b>WHOLE COHORT<br/>(1945-2008)</b>             |                                  |              |                                         |              |             |                      |                      |
|-------------------------------------------------|----------------------------------|--------------|-----------------------------------------|--------------|-------------|----------------------|----------------------|
| ADHD<br>prev=0.29%                              | <b>ADHD group<br/>(N=19,053)</b> |              | <b>Non-ADHD group<br/>(N=6,325,168)</b> |              | <b>OR</b>   | <b>95%<br/>Lower</b> | <b>95%<br/>Upper</b> |
| <b>Diagnosed sleep<br/>disorder</b>             | <b>N</b>                         | <b>%</b>     | <b>N</b>                                | <b>%</b>     |             |                      |                      |
| Insomnia                                        | 278                              | 1.46         | 8644                                    | 0.14         | 13.81       | 12.24                | 15.59                |
| Hypersomnia                                     | 39                               | 0.20         | 1525                                    | 0.02         | 10.47       | 7.61                 | 14.42                |
| Sleepwalk                                       | 9                                | 0.05         | 436                                     | 0.01         | 6.17        | 3.18                 | 11.95                |
| Sleep-wake<br>schedule<br>(circadian<br>rhythm) | 91                               | 0.48         | 1852                                    | 0.03         | 16.07       | 13.00                | 19.87                |
| Sleep terror                                    | 8                                | 0.04         | 329                                     | 0.01         | 5.94        | 2.94                 | 11.98                |
| Nightmares                                      | 8                                | 0.04         | 347                                     | 0.01         | 7.36        | 3.64                 | 14.86                |
| Other                                           | 36                               | 0.19         | 1174                                    | 0.02         | 11.17       | 8.00                 | 15.60                |
| Unspecified                                     | 665                              | 3.49         | 23289                                   | 0.37         | 11.00       | 10.16                | 11.90                |
| RLS                                             | 30                               | 0.16         | 3535                                    | 0.06         | 5.30        | 3.70                 | 7.61                 |
| Sleep apnoea                                    | 243                              | 1.28         | 60772                                   | 0.96         | 2.34        | 2.06                 | 2.66                 |
| Narcolepsy and<br>cataplexy                     |                                  |              | 461                                     | 0.01         | 7.75        | 4.14                 | 14.54                |
| <i>Any sleep<br/>disorder</i>                   | <i>1242</i>                      | <i>6.52</i>  | <i>95075</i>                            | <i>1.50</i>  | <i>6.71</i> | <i>6.32</i>          | <i>7.11</i>          |
| <b>Medication<br/>prescription</b>              |                                  |              |                                         |              |             |                      |                      |
| Zopiclone                                       | 3452                             | 18.12        | 403688                                  | 6.38         | 6.08        | 5.84                 | 6.32                 |
| Zolpidem                                        | 2141                             | 11.24        | 298378                                  | 4.72         | 4.85        | 4.62                 | 5.08                 |
| Melatonin                                       | 1669                             | 8.76         | 56969                                   | 0.90         | 12.25       | 11.64                | 12.89                |
| Propiomazin                                     | 3741                             | 19.63        | 357999                                  | 5.66         | 6.70        | 6.45                 | 6.95                 |
| Zaleplon                                        | 207                              | 1.09         | 17626                                   | 0.28         | 6.83        | 5.94                 | 7.84                 |
| <i>Any sleep<br/>medication</i>                 | <i>6463</i>                      | <i>33.92</i> | <i>757782</i>                           | <i>11.98</i> | <i>7.11</i> | <i>6.89</i>          | <i>7.34</i>          |

Note: OR=Odds ratio, 95% CI=95% Confidence interval, RLS=Restless Leg Syndrome.
